# Supplementary material for: Complex micropatterning of periodic structures on elastomeric surfaces
Source: Royal Society of Chemistry journal article supplement (doi:10.1039/b811817e), 2008-01-01
Supplement: b811817e.pdf [file b811817e.pdf]

# Complex micropatterning of periodic structures on elastomeric surfaces

Arnaud Chiche, Christopher Stafford and João T. Cabral\*

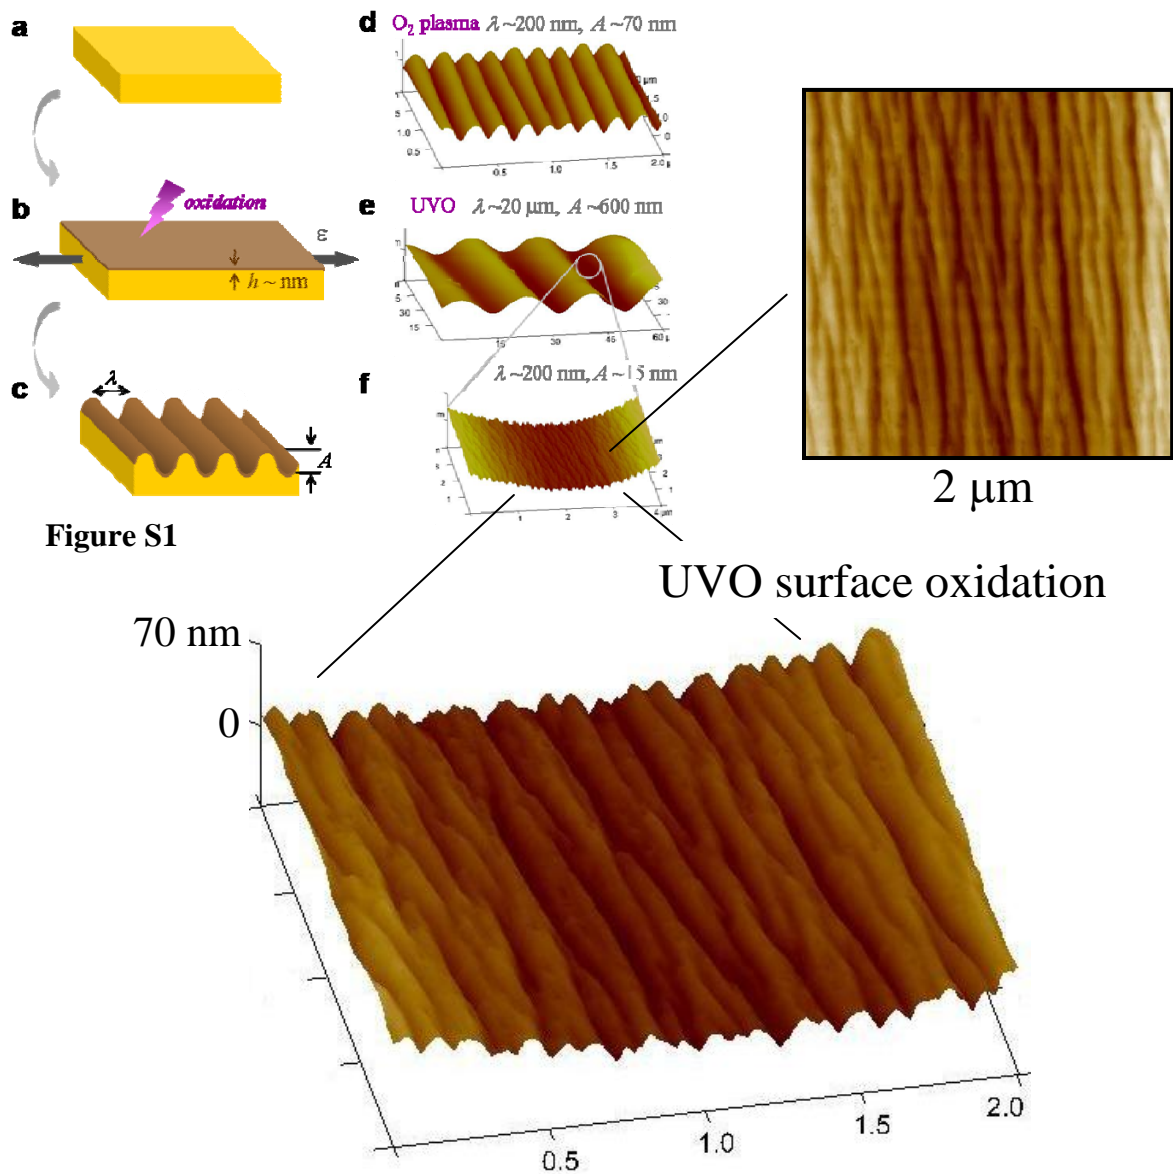

In contrast with oxygen plasma oxidation, UVO induces a complex conversion profile of the top glass-like layer in PDMS which results in secondary ('nested') buckling and comparatively larger dominant wavelengths (10s of  $\mu\text{m}$ ).
